# Supplementary material for: High-resolution 13C NMR studies of cellulose and cellulose oligomers in ionic liquid solutions
Source: Royal Society of Chemistry journal article supplement (doi:10.1039/b417745b), 2005-01-01
Supplement: b417745b.pdf [file b417745b.pdf]

**Moulthrop *et al.*** Assignments of the  $^{13}\text{C}$  NMR spectra of cellulose and cellulose oligomers in  $[\text{C}_4\text{mim}]\text{Cl}/\text{DMSO-d}_6$  solution at 90 °C.

| Molecule      | Glucose residue       | Chemical shifts (ppm) <sup>a,b,c</sup> |      |      |      |      |      |
|---------------|-----------------------|----------------------------------------|------|------|------|------|------|
|               |                       | C1                                     | C2   | C3   | C4   | C5   | C6   |
| Cellobiose    | Reducing end $\alpha$ | 93.1                                   | 72.2 | 73.1 | 81.9 | 71.0 | 61.2 |
|               | Reducing end $\beta$  | 97.7                                   | 75.8 | 75.9 | 81.3 | 76.0 | 61.2 |
|               | Nonreducing end       | 103.7                                  | 75.0 | 77.7 | 71.4 | 77.9 | 61.9 |
| Cellotetraose | Reducing end $\alpha$ | 93.0                                   | 72.2 | 73.1 | 81.3 | 71.0 | 61.0 |
|               | Reducing end $\beta$  | 97.7                                   | 75.7 | 75.8 | 80.2 | 76.0 | 61.0 |
|               | Internal residues     | 103.3                                  | 74.8 | 75.9 | 80.7 | 76.2 | 61.0 |
|               | Nonreducing end       | 103.6                                  | 75.0 | 77.7 | 71.4 | 77.9 | 61.9 |
| Cellohexaose  | Reducing end $\alpha$ | 93.0                                   | 72.2 | 73.2 | 81.3 | 71.0 | 61.1 |
|               | Reducing end $\beta$  | 97.7                                   | 75.9 | 75.9 | 80.7 | 76.0 | 61.1 |
|               | Internal residues     | 103.1                                  | 74.8 | 75.8 | 80.1 | 76.3 | 61.1 |
|               | Nonreducing end       | 103.6                                  | 75.0 | 77.7 | 71.4 | 77.9 | 61.9 |
| Cellulose     | Internal residues     | 103.2                                  | 74.7 | 75.8 | 80.2 | 76.2 | 61.1 |

- a) All spectra were referenced indirectly to the temperature-corrected  $^{13}\text{C}$  resonance of dioxane in  $\text{D}_2\text{O}$  solution (reference 12).
- b) Assignments for some of the C2, C3, and C5 carbon resonances are tentative, and were based on the variation of signal intensities observed between oligomers as well as on comparisons to assignments reported in aqueous solution (reference 9).
- c) Resonances for equivalent carbons of the internal and nonreducing glucose residues corresponding to the  $\alpha$  and  $\beta$  anomers are either overlapped or reported as the average of the two signals.
